# Supplementary material
Source: MDPI journal article supplement (https://www.mdpi.com/2071-1050/12/1/170)
Supplement: s1 [file s1]

# Supplementary Materials: Developing Guidelines for Thermal Comfort and Energy Saving During Hot Season of Multipurpose Senior Centers in Thailand.

Participant No  Data No

## Questionnaire

### Part 1: Indoor and outdoor environment

|   |                                     |                                       |                                      |
|---|-------------------------------------|---------------------------------------|--------------------------------------|
| 1 | Date.....                           |                                       |                                      |
| 2 | Times.....                          |                                       |                                      |
| 3 | Season                              |                                       |                                      |
|   | Hot season <input type="checkbox"/> | Rainy season <input type="checkbox"/> | Cold season <input type="checkbox"/> |
| 4 | Surveyed room name.....             |                                       |                                      |

|   |                                                                          |
|---|--------------------------------------------------------------------------|
| 5 | Outdoor environment (using data from the Thai Meteorological Department) |
|   | Outdoor air temperature [°C] .....                                       |
|   | Outdoor Relative humidity [%] .....                                      |
|   | Outdoor Air velocity [ m/s].....                                         |
|   | Others.....                                                              |

|   |                                                  |
|---|--------------------------------------------------|
| 6 | Indoor environment (using data from measurement) |
|   | Air temperature [°C] .....                       |
|   | Mean radiant temperature [°C] .....              |
|   | Relative humidity [%] .....                      |
|   | Air velocity [ m/s].....                         |

|   |                                              |
|---|----------------------------------------------|
| 7 | Surveyed point in the room.....              |
| 8 | Drawing surveyed point in the room in brief. |
|   |                                              |

## Part 2: Demographic data

|   |                                                                       |                                                               |
|---|-----------------------------------------------------------------------|---------------------------------------------------------------|
| 1 | Age [year].....                                                       |                                                               |
| 2 | Weight [kg].....                                                      |                                                               |
| 3 | Height [cm].....                                                      |                                                               |
| 4 | Gender:                                                               | Male <input type="checkbox"/> Female <input type="checkbox"/> |
| 5 | Occupant's Activity Level (Tick the one that is most suitable)        |                                                               |
|   | Seat quiet / writing/ Reading seated 1.0 met <input type="checkbox"/> | Typing 1.1 met <input type="checkbox"/>                       |
|   | Filling, seated/ Standing, relaxed 1.2 met <input type="checkbox"/>   | Filling, standing 1.4 met <input type="checkbox"/>            |

## Part 3: Clothing insulation of the subjects

|                                                                                                                                                                                                                                                                                                                                                                                                                                                                                                                                                                                                                                                                                                                                                                                                                                                                                                                                                                                                                                                                                                                                                                                                                                                                                                                                                                                                                                                                                                                                                                                                                                                                                                                                                                                                                                                                                                                                                                                                                                                                                                                                                                                                                                                                                                                                                                                                                                                                                                                                                                                                                                                                                                                                                                                                                                              |                                            |  |           |  |  |
|----------------------------------------------------------------------------------------------------------------------------------------------------------------------------------------------------------------------------------------------------------------------------------------------------------------------------------------------------------------------------------------------------------------------------------------------------------------------------------------------------------------------------------------------------------------------------------------------------------------------------------------------------------------------------------------------------------------------------------------------------------------------------------------------------------------------------------------------------------------------------------------------------------------------------------------------------------------------------------------------------------------------------------------------------------------------------------------------------------------------------------------------------------------------------------------------------------------------------------------------------------------------------------------------------------------------------------------------------------------------------------------------------------------------------------------------------------------------------------------------------------------------------------------------------------------------------------------------------------------------------------------------------------------------------------------------------------------------------------------------------------------------------------------------------------------------------------------------------------------------------------------------------------------------------------------------------------------------------------------------------------------------------------------------------------------------------------------------------------------------------------------------------------------------------------------------------------------------------------------------------------------------------------------------------------------------------------------------------------------------------------------------------------------------------------------------------------------------------------------------------------------------------------------------------------------------------------------------------------------------------------------------------------------------------------------------------------------------------------------------------------------------------------------------------------------------------------------------|--------------------------------------------|--|-----------|--|--|
| 1                                                                                                                                                                                                                                                                                                                                                                                                                                                                                                                                                                                                                                                                                                                                                                                                                                                                                                                                                                                                                                                                                                                                                                                                                                                                                                                                                                                                                                                                                                                                                                                                                                                                                                                                                                                                                                                                                                                                                                                                                                                                                                                                                                                                                                                                                                                                                                                                                                                                                                                                                                                                                                                                                                                                                                                                                                            | Total clothing insulation value [clo]..... |  |           |  |  |
| <div style="display: flex; justify-content: space-between;"> <div style="width: 45%;"> <p><input type="checkbox"/> Scarf    <input type="checkbox"/> Cap    <input type="checkbox"/> Hat</p> <div style="display: flex; justify-content: space-between;"> <div> <input type="checkbox"/> Long-sleeve T-shirt<br/> <input type="checkbox"/> Long-sleeve shirt </div> <div> <input type="checkbox"/> Vest<br/> <input type="checkbox"/> T-shirt<br/> <input type="checkbox"/> Short-sleeve shirt<br/> <input type="checkbox"/> Suit/ jacket </div> </div> <div style="display: flex; justify-content: space-between;"> <div> <input type="checkbox"/> Sweat pants<br/> <input type="checkbox"/> Loincloth<br/> <input type="checkbox"/> Trousers </div> <div> <input type="checkbox"/> Underpants<br/> <input type="checkbox"/> bathing cloth<br/> <input type="checkbox"/> Shorts </div> </div> <div style="display: flex; justify-content: space-between;"> <div> <input type="checkbox"/> Socks<br/> <input type="checkbox"/> Sandals<br/> <input type="checkbox"/> Shoes </div> <div> <input type="checkbox"/> Bare feet<br/> <input type="checkbox"/> Boots<br/> <input type="checkbox"/> Casual shoes </div> </div> </div> <div style="width: 45%;"> <p><input type="checkbox"/> Hat    <input type="checkbox"/> Cap    <input type="checkbox"/> scarf</p> <div style="display: flex; justify-content: space-between;"> <div> <input type="checkbox"/> Bra<br/> <input type="checkbox"/> T-shirt<br/> <input type="checkbox"/> Short-sleeve shirt<br/> <input type="checkbox"/> Suit/ jacket<br/> <input type="checkbox"/> Dress </div> <div> <input type="checkbox"/> Vest<br/> <input type="checkbox"/> Long-sleeve T-shirt<br/> <input type="checkbox"/> Long-sleeve shirt<br/> <input type="checkbox"/> Cardigan </div> </div> <div style="display: flex; justify-content: space-between;"> <div> <input type="checkbox"/> Underwear<br/> <input type="checkbox"/> Knee-length skirt<br/> <input type="checkbox"/> Shorts<br/> <input type="checkbox"/> Sweat pants<br/> <input type="checkbox"/> Sarong </div> <div> <input type="checkbox"/> Slip skirt<br/> <input type="checkbox"/> Angle-length skirt<br/> <input type="checkbox"/> Trousers<br/> <input type="checkbox"/> Loincloth </div> </div> <div style="display: flex; justify-content: space-between;"> <div> <input type="checkbox"/> Bare feet<br/> <input type="checkbox"/> Boots<br/> <input type="checkbox"/> Casual shoes </div> <div> <input type="checkbox"/> Socks<br/> <input type="checkbox"/> Sandals<br/> <input type="checkbox"/> Shoes </div> </div> </div> </div> <div style="text-align: center; margin: 10px 0;"> 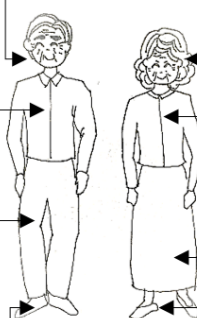 </div> <tr> <td colspan="3">Note.....</td> </tr> |                                            |  | Note..... |  |  |
| Note.....                                                                                                                                                                                                                                                                                                                                                                                                                                                                                                                                                                                                                                                                                                                                                                                                                                                                                                                                                                                                                                                                                                                                                                                                                                                                                                                                                                                                                                                                                                                                                                                                                                                                                                                                                                                                                                                                                                                                                                                                                                                                                                                                                                                                                                                                                                                                                                                                                                                                                                                                                                                                                                                                                                                                                                                                                                    |                                            |  |           |  |  |

## Part 4: Thermal sensation

### 4.1 feeling to environmental parameters

|   |                                                                     |                                  |                                           |                                     |                                            |                                   |                                        |
|---|---------------------------------------------------------------------|----------------------------------|-------------------------------------------|-------------------------------------|--------------------------------------------|-----------------------------------|----------------------------------------|
| 1 | How do you feel about the temperature in the room at this moment ?  |                                  |                                           |                                     |                                            |                                   |                                        |
|   | Cold<br><input type="checkbox"/>                                    | Cool<br><input type="checkbox"/> | Slightly cool<br><input type="checkbox"/> | Neutral<br><input type="checkbox"/> | Slightly warm<br><input type="checkbox"/>  | warm<br><input type="checkbox"/>  | Hot<br><input type="checkbox"/>        |
| 2 | How do you feel about the humidity in the room at this moment ?     |                                  |                                           |                                     |                                            |                                   |                                        |
|   | Very dry<br><input type="checkbox"/>                                | Dry<br><input type="checkbox"/>  | Slightly dry<br><input type="checkbox"/>  | Neutral<br><input type="checkbox"/> | Slightly humid<br><input type="checkbox"/> | Humid<br><input type="checkbox"/> | Very humid<br><input type="checkbox"/> |
| 3 | How do you feel about the air velocity in the room at this moment ? |                                  |                                           |                                     |                                            |                                   |                                        |
|   | Very low<br><input type="checkbox"/>                                | Low<br><input type="checkbox"/>  | Slightly low<br><input type="checkbox"/>  | Neutral<br><input type="checkbox"/> | Slightly high<br><input type="checkbox"/>  | High<br><input type="checkbox"/>  | Very high<br><input type="checkbox"/>  |

## 4.2 Overall feeling

|   |                                                                            |                                           |                                                   |                                                 |                                         |                                                 |
|---|----------------------------------------------------------------------------|-------------------------------------------|---------------------------------------------------|-------------------------------------------------|-----------------------------------------|-------------------------------------------------|
| 1 | Do you comfortable now ?                                                   |                                           |                                                   |                                                 |                                         |                                                 |
|   | Very<br>Uncomfortable<br><input type="checkbox"/>                          | Uncomfortable<br><input type="checkbox"/> | Just<br>Uncomfortable<br><input type="checkbox"/> | Just<br>Comfortable<br><input type="checkbox"/> | Comfortable<br><input type="checkbox"/> | Very<br>Comfortable<br><input type="checkbox"/> |
| 2 | How do you feel skin moisture at this time ?                               |                                           |                                                   |                                                 |                                         |                                                 |
|   | None<br><input type="checkbox"/>                                           |                                           | Slightly<br><input type="checkbox"/>              |                                                 | Moderate<br><input type="checkbox"/>    | Profuse<br><input type="checkbox"/>             |
| 3 | How do you rate the overall acceptability of the feelings at this moment ? |                                           |                                                   |                                                 |                                         |                                                 |
|   | Acceptable <input type="checkbox"/>                                        |                                           |                                                   | Not acceptable <input type="checkbox"/>         |                                         |                                                 |

## 4.3 Thermal preference

|   |                                                    |                                                        |                                       |                                                        |                                                    |
|---|----------------------------------------------------|--------------------------------------------------------|---------------------------------------|--------------------------------------------------------|----------------------------------------------------|
| 1 | What do you like to be about the temperature?      |                                                        |                                       |                                                        |                                                    |
|   | Much warmer<br><input type="checkbox"/>            | Slightly warmer<br><input type="checkbox"/>            | No change<br><input type="checkbox"/> | Slightly cooler<br><input type="checkbox"/>            | Much cooler<br><input type="checkbox"/>            |
| 2 | What do you like to be about the humidity?         |                                                        |                                       |                                                        |                                                    |
|   | Much increase<br>humidity <input type="checkbox"/> | Slightly increase<br>humidity <input type="checkbox"/> | No change<br><input type="checkbox"/> | Slightly decrease<br>humidity <input type="checkbox"/> | Much decrease<br>humidity <input type="checkbox"/> |
| 3 | What do you like to be about the air velocity?     |                                                        |                                       |                                                        |                                                    |
|   | Much increase<br>velocity <input type="checkbox"/> | Slightly increase<br>velocity <input type="checkbox"/> | No change<br><input type="checkbox"/> | Slightly decrease<br>velocity <input type="checkbox"/> | Much decrease<br>velocity <input type="checkbox"/> |

## 4.4 Others

Note.....

.....

.....

.....
